# Supplementary material
Source: publisher figshare collection journal article supplement (https://acs.figshare.com/ndownloader/files/28468499)
Supplement: Supplementary file 1 [file 28468499]

## Supporting Information

### **Discovery, Optimization, and Evaluation of Quinazolinone Derivatives with Novel Linkers as Orally Efficacious Phosphoinositide-3-Kinase delta Inhibitors for the Treatment of Inflammatory Diseases**

Kongjun Liu<sup>a,§</sup>, Dan Li<sup>a,§</sup>, Wei Zheng<sup>a,§</sup>, Mingsong Shi<sup>a,§</sup>, Yong Chen<sup>a</sup>, Minghai Tang<sup>a</sup>, Tao Yang<sup>a</sup>, Min Zhao<sup>a</sup>, Dexin Deng<sup>a</sup>, Chufeng Zhang<sup>a</sup>, Jiang Liu<sup>a</sup>, Xue Yuan<sup>a</sup>, Zhuang Yang<sup>a,\*</sup>, and Lijuan Chen<sup>a,\*</sup>

<sup>a</sup> Laboratory of Natural and targeted small molecule drugs, State Key Laboratory of Biotherapy and Cancer Center, National Clinical Research Center for Geriatrics, West China Hospital, Sichuan University and Collaborative Innovation Center of Biotherapy, Chengdu, 610041, China

<sup>§</sup> These authors contributed equally and should be considered as co-first authors.

\* Lijuan Chen. Tel: +86-28-85164063; E-mail address: chenlijuan125@163.com.

\* Zhuang Yang. Tel: +86-28-85164063; E-mail address: young9008@126.com.

## Table of Contents for Support Information

| Content                                                                                                                                            | Page   |
|----------------------------------------------------------------------------------------------------------------------------------------------------|--------|
| <b>Table S1.</b> Kinome Wide Selectivity Profiling of Compound <b>50</b>                                                                           | S3-7   |
| <b>Table S2-4.</b> Predicted results from SMARTCyp cytochrome P450 metabolism server for compound <b>43</b>                                        | S7-9   |
| <b>Table S5.</b> The effects of compound <b>50</b> and idelalisib on normal cells viability.                                                       | S10    |
| <b>Table S6 and 7.</b> Binding affinity estimation of idelalisib and <b>50</b> to PI3K $\delta$                                                    | S11    |
| <b>Figure S1.</b> Cocrystal structure of Idelalisib in PI3K $\delta$                                                                               | S12    |
| <b>Figure S2.</b> Docking model of compound <b>29</b> in PI3K $\delta$                                                                             | S12    |
| <b>Figure S3.</b> Pre-experiments of compound <b>45</b> , <b>46</b> , <b>47</b> , <b>50</b> and dexamethasone in collagen-induced arthritis models | S13    |
| <b>Figure S4 and 5.</b> Snapshots of the idelalisib and compound <b>50</b> /PI3K $\delta$ complex                                                  | S13-14 |
| <b>Figure S6.</b> Therapeutic efficacy of <b>50</b> in mice established collagen-induced arthritis.                                                | S15    |
| <b>Figure S7.</b> HPLC spectra of compound <b>50</b>                                                                                               | S16    |
| <b>Figure S8-14.</b> <sup>1</sup> H NMR data of compounds <b>26</b> , <b>30</b> , <b>45</b> , <b>46</b> , <b>47</b> , <b>49</b> , and <b>50</b>    | S17-20 |
| The instructions of SMARTCyp cytochrome P450 metabolism prediction server                                                                          | S20-22 |
| Experimental procedures for docking and calculation                                                                                                | S22-25 |
| Biological Assay Methods                                                                                                                           | S25-34 |

**Table S1.** Kinome Wide Selectivity Profiling of Compound **50**

| Kinase               | Kinase family | Percent control (%) at 10 $\mu$ M |
|----------------------|---------------|-----------------------------------|
| AAK1(h)              | MISC          | 91                                |
| Abl(h)               | TK            | 113                               |
| ACK1(h)              | TK            | 107                               |
| ACTR2(h)             | TKL           | 83                                |
| ALK(h)               | TK            | 148                               |
| Arg(h)               | TK            | 134                               |
| AMPK $\alpha$ 1(h)   | CAMK          | 92                                |
| A-Raf(h)             | TKL           | 76                                |
| ASK1(h)              | STE           | 107                               |
| Aurora-A(h)          | MISC          | 85                                |
| Axl(h)               | TK            | 111                               |
| Blk(h)               | TK            | 85                                |
| BMPR2(h)             | TKL           | 99                                |
| Bmx(h)               | TK            | 128                               |
| BRK(h)               | TK            | 95                                |
| BrSK1(h)             | CAMK          | 118                               |
| BTK(h)               | TK            | 97                                |
| B-Raf(h)             | TKL           | 94                                |
| CaMKI(h)             | CAMK          | 108                               |
| CDK1/cyclinB(h)      | CMGC          | 124                               |
| CDK2/cyclinA(h)      | CMGC          | 86                                |
| CDK6/cyclinD3(h)     | CMGC          | 103                               |
| CDK7/cyclinH/MAT1(h) | CMGC          | 117                               |
| CDK9/cyclin T1(h)    | CMGC          | 104                               |
| CHK1(h)              | CAMK          | 102                               |
| CK1 $\gamma$ 1(h)    | CK1           | 91                                |
| CK2 $\alpha$ 2(h)    | CMGC          | 94                                |
| CLIK1(h)             | MISC          | 112                               |
| cKit(V654A)(h)       | TK            | 79                                |
| c-RAF(h)             | TKL           | 91                                |
| DAPK1(h)             | CAMK          | 102                               |
| DCAMKL2(h)           | CAMK          | 79                                |
| DDR1(h)              | TK            | 84                                |
| DMPK(h)              | AGC           | 100                               |
| DRAK1(h)             | CAMK          | 128                               |
| DYRK1A(h)            | CMGC          | 112                               |
| eEF-2K(h)            | MISC          | 98                                |
| EGFR(h)              | TK            | 116                               |

|                    |      |     |
|--------------------|------|-----|
| EphB4(h)           | TK   | 90  |
| FAK(h)             | TK   | 112 |
| Fer(h)             | TK   | 89  |
| Fes(h)             | TK   | 95  |
| FGFR1(h)           | TK   | 113 |
| Fgr(h)             | TK   | 108 |
| Flt3(h)            | TK   | 80  |
| Fms(h)             | TK   | 94  |
| Fyn(h)             | TK   | 118 |
| GCK(h)             | STE  | 79  |
| GCN2(h)            | MISC | 114 |
| GRK1(h)            | AGC  | 77  |
| GSK3 $\beta$ (h)   | CMGC | 105 |
| HIPK1(h)           | CMGC | 89  |
| HRI(h)             | MISC | 88  |
| ICK(h)             | CMGC | 79  |
| IGF-1R(h)          | TK   | 135 |
| IKK $\alpha$ (h)   | MISC | 120 |
| IR(h)              | TK   | 106 |
| IRAK4(h)           | TKL  | 132 |
| Itk(h)             | TK   | 106 |
| JAK1(h)            | TK   | 97  |
| JAK2(h)            | TK   | 102 |
| JNK1 $\alpha$ 1(h) | CMGC | 95  |
| KDR(h)             | TK   | 96  |
| Lck(h)             | TK   | 79  |
| LIMK1(h)           | TKL  | 79  |
| LOK(h)             | STE  | 109 |
| Lyn(h)             | TK   | 95  |
| LRRK2(h)           | TKL  | 90  |
| LTK(h)             | TK   | 93  |
| MAPK1(h)           | CMGC | 93  |
| MAP4K3(h)          | STE  | 75  |
| MAPKAP-K2(h)       | CAMK | 103 |
| MEK1(h)            | STE  | 104 |
| MARK1(h)           | CAMK | 76  |
| MEKK2(h)           | STE  | 90  |
| Mer(h)             | TK   | 100 |
| MINK(h)            | STE  | 110 |
| MKK6(h)            | STE  | 79  |
| MLK1(h)            | TKL  | 73  |

|                     |                |     |
|---------------------|----------------|-----|
| Mnk2(h)             | CAMK           | 90  |
| MRCK $\alpha$ (h)   | AGC            | 94  |
| MSK1(h)             | AGC            | 129 |
| MSK2(h)             | AGC            | 101 |
| MST1(h)             | STE            | 127 |
| mTOR(h)             | Lipid/Atypical | 65  |
| mTOR/FKBP12(h)      | Lipid/Atypical | 74  |
| MuSK(h)             | TK             | 86  |
| MYLK2(h)            | CAMK           | 107 |
| MYO3B(h)            | STE            | 79  |
| NDR2(h)             | AGC            | 103 |
| NEK2(h)             | MISC           | 119 |
| NIM1(h)             | CAMK           | 123 |
| NLK(h)              | CMGC           | 90  |
| p70S6K(h)           | AGC            | 75  |
| PAK2(h)             | STE            | 97  |
| PAR-1B $\alpha$ (h) | CAMK           | 73  |
| PASK(h)             | CAMK           | 98  |
| PDGFR $\beta$ (h)   | TK             | 102 |
| PDK1(h)             | AGC            | 104 |
| PhK $\gamma$ 1(h)   | CAMK           | 89  |
| Pim-1(h)            | CAMK           | 108 |
| PKA(h)              | AGC            | 100 |
| PKB $\alpha$ (h)    | AGC            | 114 |
| PKC $\alpha$ (h)    | AGC            | 113 |
| PKC $\theta$ (h)    | AGC            | 123 |
| PKD2(h)             | CAMK           | 100 |
| PKG1 $\alpha$ (h)   | AGC            | 81  |
| Plk3(h)             | MISC           | 100 |
| PRAK(h)             | CAMK           | 115 |
| PRK1(h)             | AGC            | 85  |
| PRP4(h)             | CMGC           | 105 |
| Ret(h)              | TK             | 103 |
| RIPK1(h)            | TKL            | 98  |
| ROCK-I(h)           | AGC            | 101 |
| Ron(h)              | TK             | 74  |
| Ros(h)              | TK             | 84  |
| Rse(h)              | TK             | 114 |
| Rsk1(h)             | AGC            | 143 |
| Rsk2(h)             | AGC            | 110 |
| SAPK2a(h)           | CMGC           | 97  |

|                                                      |                |     |
|------------------------------------------------------|----------------|-----|
| SBK1(h)                                              | MISC           | 124 |
| SGK(h)                                               | AGC            | 103 |
| SIK(h)                                               | CAMK           | 98  |
| SNRK(h)                                              | CAMK           | 106 |
| Src(1-530)(h)                                        | TK             | 81  |
| SRMS(h)                                              | TK             | 92  |
| SRPK1(h)                                             | CMGC           | 117 |
| STK16(h)                                             | MISC           | 82  |
| Syk(h)                                               | TK             | 72  |
| TAK1(h)                                              | TKL            | 124 |
| TBK1(h)                                              | MISC           | 97  |
| Tec(h) activated                                     | TK             | 78  |
| TGFBR1(h)                                            | TKL            | 88  |
| Tie2 (h)                                             | TK             | 91  |
| TLK1(h)                                              | MISK           | 90  |
| TNIK(h)                                              | STE            | 76  |
| TrkA(h)                                              | TK             | 86  |
| TSSK1(h)                                             | CAMK           | 73  |
| TTBK1(h)                                             | CK1            | 91  |
| TTK(h)                                               | MISC           | 104 |
| Txk(h)                                               | TK             | 90  |
| TYK2(h)                                              | TK             | 83  |
| ULK1(h)                                              | MISC           | 99  |
| VRK1(h)                                              | CK1            | 96  |
| Wee1(h)                                              | MISC           | 90  |
| WNK1(h)                                              | MISC           | 100 |
| Yes(h)                                               | TK             | 103 |
| ZAK(h)                                               | TKL            | 93  |
| ZAP-70(h)                                            | TK             | 109 |
| ZIPK(h)                                              | CAMK           | 108 |
| ATM(h)                                               | Lipid/Atypical | 120 |
| ATR/ATRIP(h)                                         | Lipid/Atypical | 95  |
| PI3 Kinase (p110 $\delta$ /p85 $\alpha$ )(h)         | Lipid/Atypical | -10 |
| PI3 Kinase (p110 $\alpha$ /p85 $\alpha$ )(h)         | Lipid/Atypical | 45  |
| PI3 Kinase (p110 $\alpha$ (E542K)/p85 $\alpha$ )(h)  | Lipid/Atypical | 31  |
| PI3 Kinase (p110 $\alpha$ (H1047R)/p85 $\alpha$ )(h) | Lipid/Atypical | 14  |
| PI3 Kinase (p110 $\alpha$ (E545K)/p85 $\alpha$ )(h)  | Lipid/Atypical | 25  |
| PI3 Kinase (p110 $\alpha$ /p65 $\alpha$ )(h)         | Lipid/Atypical | 20  |
| PI3KC2 $\alpha$ (h)                                  | Lipid/Atypical | 91  |
| PI3KC2 $\gamma$ (h)                                  | Lipid/Atypical | 53  |
| PIP4K2 $\alpha$ (h)                                  | Lipid/Atypical | 101 |

|                     |                |    |
|---------------------|----------------|----|
| PIP5K1 $\alpha$ (h) | Lipid/Atypical | 96 |
| PIP5K1 $\gamma$ (h) | Lipid/Atypical | 87 |

**Table S2.** Predicted results of compound **43** from the CYP3A4 model in SMARTCyp<sup>a</sup>

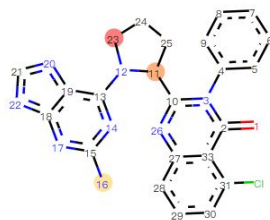

| 3A4 Ranking | Atom | 3A4 Score | Energy | 2DSASA | Span2end | Relative Span | Similarity |
|-------------|------|-----------|--------|--------|----------|---------------|------------|
| 1           | C.23 | 34.0      | 41.1   | 31.0   | 3        | 0.7           | 0.7        |
| 2           | C.11 | 36.4      | 41.1   | 7.3    | 5        | 0.5           | 0.3        |
| 3           | N.16 | 44.1      | 54.1   | 50.2   | 0        | 1.0           | 0.7        |
| 4           | C.21 | 48.3      | 57.9   | 39.6   | 0        | 1.0           | 1.0        |
| 5           | N.12 | 58.8      | 63.9   | 1.3    | 4        | 0.6           | 0.3        |
| 6           | C.30 | 59.1      | 68.2   | 27.4   | 0        | 1.0           | 1.0        |
| 7           | N.17 | 66.9      | 75.6   | 17.8   | 0        | 1.0           | 0.3        |
| 8           | N.14 | 68.6      | 75.6   | 10.5   | 2        | 0.8           | 0.3        |
| 9           | C.24 | 68.7      | 75.9   | 35.1   | 3        | 0.7           | 0.7        |
| 10          | C.28 | 69.5      | 77.2   | 27.6   | 2        | 0.8           | 1.0        |
| 11          | C.25 | 69.6      | 75.9   | 29.5   | 4        | 0.6           | 0.3        |
| 12          | N.26 | 70.3      | 75.6   | 6.1    | 4        | 0.6           | 0.3        |
| 13          | C.29 | 72.3      | 80.8   | 31.6   | 1        | 0.9           | 1.0        |
| 14          | C.7  | 76.9      | 86.3   | 36.2   | 0        | 1.0           | 1.0        |
| 15          | C.6  | 77.7      | 86.3   | 33.5   | 1        | 0.9           | 1.0        |
| 16          | C.5  | 78.6      | 86.3   | 27.6   | 2        | 0.8           | 1.0        |
| 17          | N.20 | 83.9      | 92.1   | 22.1   | 1        | 0.9           | 0.7        |

<sup>a</sup> The atoms in the table are ranked by score, with the lowest score resulting in the lowest rank, and thus the highest probability of being a site of metabolism.

**Table S3.** Predicted results of compound **43** from the CYP2D6 model in SMARTCyp<sup>a</sup>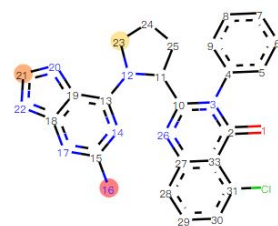

| 2D6 Ranking | Atom | 2D6 Score | Energy | 2DSASA | Span2end | N+dist | Similarity |
|-------------|------|-----------|--------|--------|----------|--------|------------|
| 1           | N.16 | 52.1      | 54.1   | 50.2   | 0        | 0      | 0.7        |
| 2           | C.21 | 56.3      | 57.9   | 39.6   | 0        | 0      | 1.0        |
| 3           | C.23 | 60.0      | 41.1   | 31.0   | 3        | 0      | 0.7        |
| 4           | C.30 | 67.1      | 68.2   | 27.4   | 0        | 0      | 1.0        |
| 5           | C.11 | 67.7      | 41.1   | 7.3    | 5        | 0      | 0.3        |
| 6           | N.17 | 74.9      | 75.6   | 17.8   | 0        | 0      | 0.3        |
| 7           | C.7  | 84.9      | 86.3   | 36.2   | 0        | 0      | 1.0        |
| 8           | C.29 | 86.2      | 80.8   | 31.6   | 1        | 0      | 1.0        |
| 9           | N.14 | 88.6      | 75.6   | 10.5   | 2        | 0      | 0.3        |
| 10          | C.28 | 89.5      | 77.2   | 27.6   | 2        | 0      | 1.0        |
| 11          | N.12 | 90.7      | 63.9   | 1.3    | 4        | 0      | 0.3        |
| 12          | C.6  | 91.7      | 86.3   | 33.5   | 1        | 0      | 1.0        |
| 13          | C.24 | 94.6      | 75.9   | 35.1   | 3        | 0      | 0.7        |
| 14          | N.20 | 97.9      | 92.1   | 22.1   | 1        | 0      | 0.7        |
| 15          | C.5  | 98.6      | 86.3   | 27.6   | 2        | 0      | 1.0        |
| 16          | C.25 | 101.6     | 75.9   | 29.5   | 4        | 0      | 0.3        |
| 17          | N.26 | 102.2     | 75.6   | 6.1    | 4        | 0      | 0.3        |

<sup>a</sup> The atoms in the table are ranked by score, with the lowest score resulting in the lowest rank, and thus the highest probability of being a site of metabolism.



**Table S4.** Predicted results of compound **43** from the CYP2C9 model in SMARTCyp<sup>a</sup>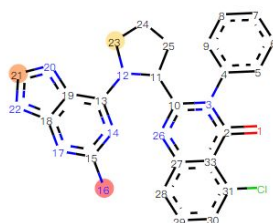

| 2C9 Ranking | Atom | 2C9 Score | Energy | 2DSASA | Span2end | COO-Dist | Similarity |
|-------------|------|-----------|--------|--------|----------|----------|------------|
| 1           | N.16 | 52.1      | 54.1   | 50.2   | 0        | 0        | 0.7        |
| 2           | C.21 | 56.3      | 57.9   | 39.6   | 0        | 0        | 1.0        |
| 3           | C.23 | 57.6      | 41.1   | 31.0   | 3        | 0        | 0.7        |
| 4           | C.11 | 64.5      | 41.1   | 7.3    | 5        | 0        | 0.3        |
| 5           | C.30 | 67.1      | 68.2   | 27.4   | 0        | 0        | 1.0        |
| 6           | N.17 | 74.9      | 75.6   | 17.8   | 0        | 0        | 0.3        |
| 7           | C.7  | 84.9      | 86.3   | 36.2   | 0        | 0        | 1.0        |
| 8           | C.29 | 85.4      | 80.8   | 31.6   | 1        | 0        | 1.0        |
| 9           | N.14 | 87.0      | 75.6   | 10.5   | 2        | 0        | 0.3        |
| 10          | N.12 | 87.5      | 63.9   | 1.3    | 4        | 0        | 0.3        |
| 11          | C.28 | 87.9      | 77.2   | 27.6   | 2        | 0        | 1.0        |
| 12          | C.6  | 90.9      | 86.3   | 33.5   | 1        | 0        | 1.0        |
| 13          | C.24 | 92.2      | 75.9   | 35.1   | 3        | 0        | 0.7        |
| 14          | C.5  | 97.0      | 86.3   | 27.6   | 2        | 0        | 1.0        |
| 15          | N.20 | 97.1      | 92.1   | 22.1   | 1        | 0        | 0.7        |
| 16          | C.25 | 98.4      | 75.9   | 29.5   | 4        | 0        | 0.3        |
| 17          | N.26 | 99.0      | 75.6   | 6.1    | 4        | 0        | 0.3        |

<sup>a</sup> The atoms in the table are ranked by score, with the lowest score resulting in the lowest rank, and thus the highest probability of being a site of metabolism

**Table S5.** The effects of compound **50** and idelalisib on normal cells viability.

| Cell line | Cell type                                   | IC <sub>50</sub> (mean ± SD) (uM) <sup>a</sup> |            | SI <sup>b</sup> (55, Normal cells/<br>Primary T cells) |
|-----------|---------------------------------------------|------------------------------------------------|------------|--------------------------------------------------------|
|           |                                             | 55                                             | idelalisib |                                                        |
| H9C2      | Rat myocardial cell line                    | >20                                            | >20        | >965                                                   |
| L929      | Mouse fibroblast cell line                  | >20                                            | >20        | >965                                                   |
| HEK293    | Human embryonic kidney epithelial cell line | 16.08 ± 0.95                                   | >20        | >776                                                   |
| LO2       | Human normal liver cell line                | >20                                            | >20        | >965                                                   |

<sup>a</sup>IC<sub>50</sub> values were obtained from three independent experiments. SI<sup>b</sup> = selectivity index, which represents the preliminary safety of compounds.

Cells (H9C2, L929, HEK293, and LO2) were seeded in 96-well plates (1500/well) at individual density in 80 uL of culture medium for 24 h. After various concentrations of compound **50** and idelalisib treatment for 72 h, at 37°C and 5% CO<sub>2</sub>, 100 uL culture medium containing 10 uL CCK-8 solutions was added and incubated for 2 h at 37°C. The optical density was measured using Spectra MAX M5 microplate spectrophotometer (Molecular Devices) at 450 nm and the IC<sub>50</sub> of each cell line was detected.

**Table S6.** Binding free energy ( $\Delta G_{\text{bind}}^{\text{cal}}$ ) for idelalisib/PI3K $\delta$  complexes and decomposition to electrostatic interaction ( $E_{\text{ele}}$ ), van der Walls interaction ( $E_{\text{vdW}}$ ) and solvation free energies ( $E_{\text{GB}}$ ). Energies are in kcal/mol.

| Energy                            | Complex           | Receptor          | Ligand        | Difference   |
|-----------------------------------|-------------------|-------------------|---------------|--------------|
| $E_{\text{vdW}}$                  | -7626.74(43.21)   | -7576.07(43.12)   | -6.24(1.46)   | -44.43(2.76) |
| $E_{\text{ele}}$                  | -64923.98(238.86) | -65035.18(238.65) | 134.52(1.85)  | -23.32(3.25) |
| $E_{\text{GB}}$                   | -10470.50(200.01) | -10480.76(200.00) | -23.26(0.63)  | 33.52(2.74)  |
| $E_{\text{surf}}$                 | 314.57(3.57)      | 316.26(3.56)      | 3.49(0.03)    | -5.18(0.22)  |
| $G_{\text{gas}}$                  | -10128.21(228.56) | -9853.30(228.27)  | -207.17(4.94) | -67.74(3.92) |
| $G_{\text{solv}}$                 | -10155.93(198.60) | -10164.50(198.62) | -19.77(0.62)  | 28.34(2.68)  |
| $E_{\text{gas}} + G_{\text{sol}}$ | -20284.14(89.22)  | -20017.80(89.07)  | -226.94(4.94) | -39.40(2.64) |

**Table S7.** Binding free energy ( $\Delta G_{\text{bind}}^{\text{cal}}$ ) for compound **50**/PI3K $\delta$  complexes and decomposition to electrostatic interaction ( $E_{\text{ele}}$ ), van der Walls interaction ( $E_{\text{vdW}}$ ) and solvation free energies ( $E_{\text{GB}}$ ). Energies are in kcal/mol.

| Energy                            | Complex           | Receptor          | Ligand       | Difference   |
|-----------------------------------|-------------------|-------------------|--------------|--------------|
| $E_{\text{vdW}}$                  | -7679.32(43.84)   | -7620.70(43.87)   | -6.21(1.52)  | -52.41(2.78) |
| $E_{\text{ele}}$                  | -65117.58(281.23) | -65146.89(281.35) | 50.51(1.30)  | -21.19(3.65) |
| $E_{\text{GB}}$                   | -10329.29(229.52) | -10341.91(229.58) | -20.14(0.53) | 32.76(3.13)  |
| $E_{\text{surf}}$                 | 310.63(4.98)      | 312.80(4.98)      | 3.63(0.03)   | -5.80(0.22)  |
| $G_{\text{gas}}$                  | -10087.78(270.72) | -10001.42(270.93) | -12.76(5.25) | -73.60(4.28) |
| $G_{\text{solv}}$                 | -10018.66(226.22) | -10029.11(226.27) | -16.51(0.52) | 26.95(3.06)  |
| $E_{\text{gas}} + G_{\text{sol}}$ | -20106.44(96.57)  | -20030.53(96.37)  | -29.26(5.26) | -46.65(2.83) |

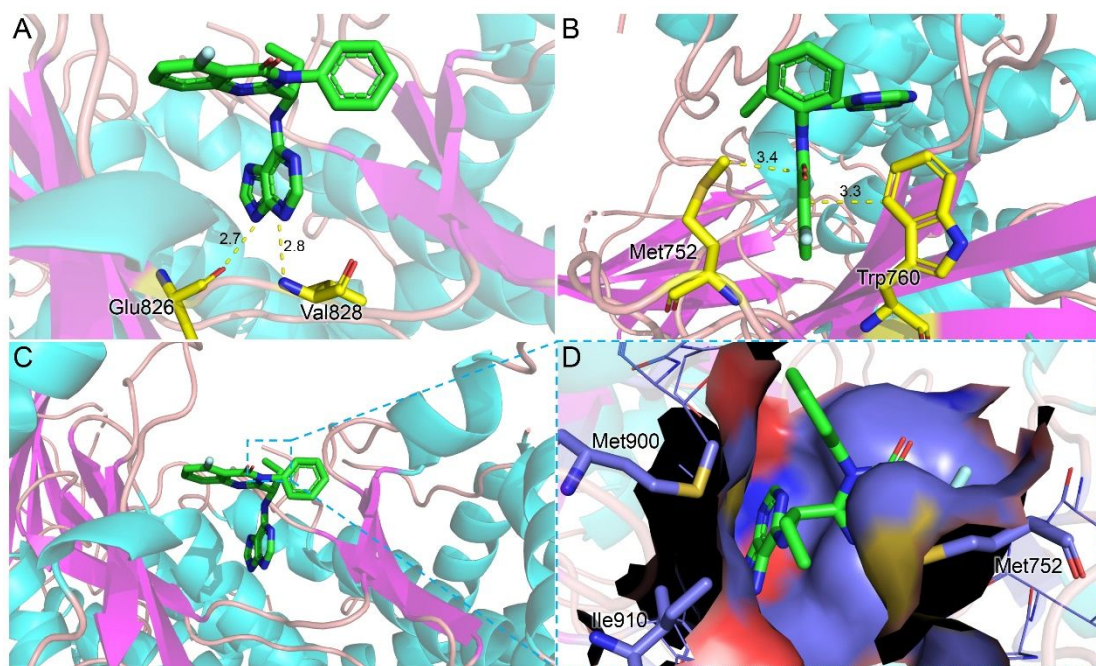

**Figure S1.** Cocystal structure of **1** in PI3K $\delta$  (PDB Code: 4XE0). (A) The purine moiety forms two hydrogen bonds with the backbones of Val-828 and Glu-826, respectively. (B) The quinazolinone motif makes a hydrophobic interaction with Met752 and Trp760. (C) Sticks figure of **1** bound to ATP binding site of the p110 catalytic subunits of PI3K $\delta$ . (D) Surface figure of **1** in the binding pocket, the (S)-ethyl group is placed in a hydrophobic pocket formed by Met752, Met900, and Ile910.

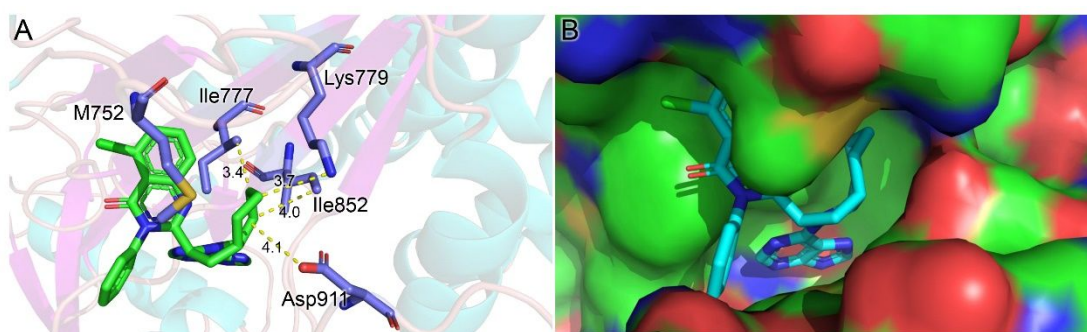

**Figure S2.** Docking model of compound **29** in PI3K $\delta$  (PDB code:4XEO). (A) Sticks figure of **29** bound to PI3K $\delta$ . (B) Surface figure of **29** bound to PI3K $\delta$ . The small hydrophobic pockets formed by Ile777, Lys779, Ile825, Asp911 and Met752 cannot

fittingly accommodate the large linker moiety.

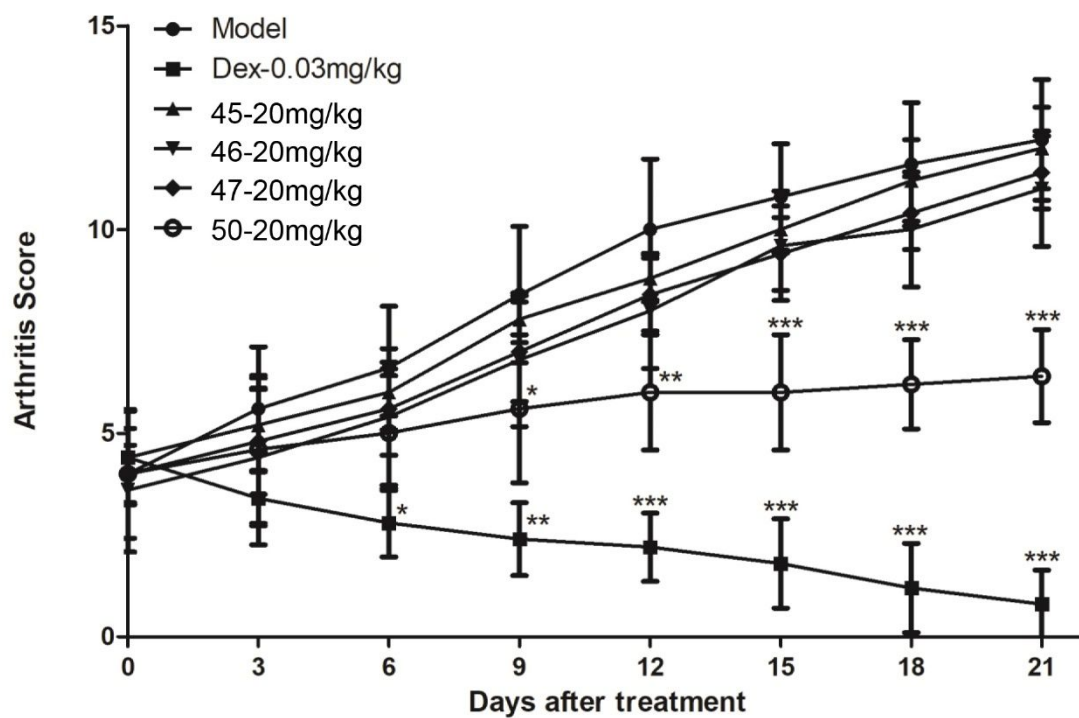

**Figure S3.** Pre-experiments of compound **45**, **46**, **47**, **50** and dexamethasone in collagen-induced arthritis models by oral administration once-daily.

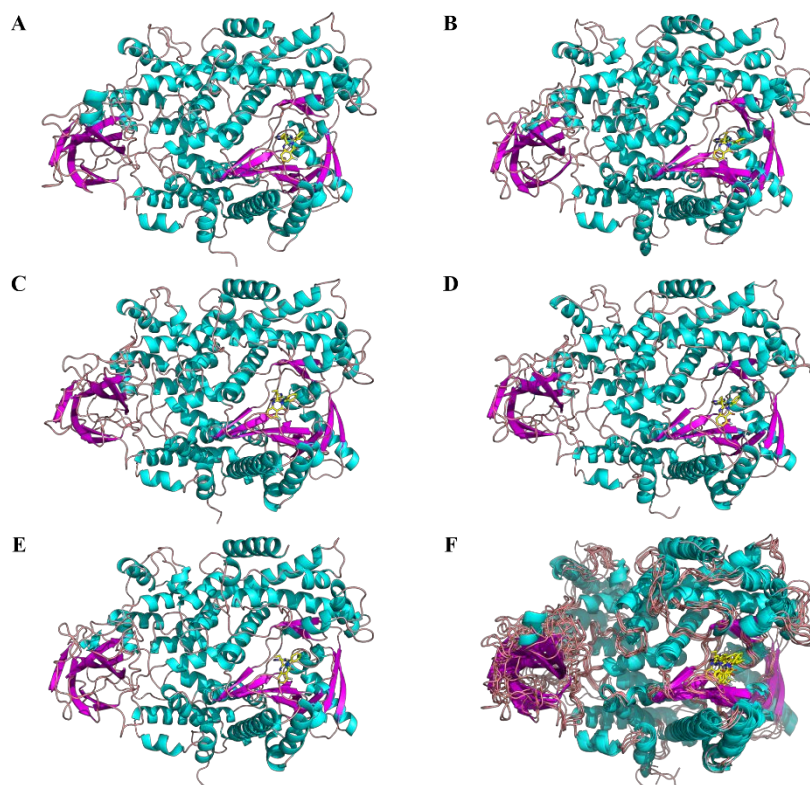



**Figure S4.** Snapshots of the idelalisib/ PI3K $\delta$  complex along the dynamic simulation time for 100<sup>th</sup>, 200<sup>th</sup>, 300<sup>th</sup>, 400<sup>th</sup> and 500<sup>th</sup> ns. For clarity, the water molecules have been removed. The idelalisib is plotted using stick style, while cartoon style for PI3K $\delta$ . (A) for 100<sup>th</sup> ns. (B) for 200<sup>th</sup> ns. (C) for 300<sup>th</sup> ns. (D) for 400<sup>th</sup> ns. (E) for 500<sup>th</sup> ns. (F) the aligned conformations.

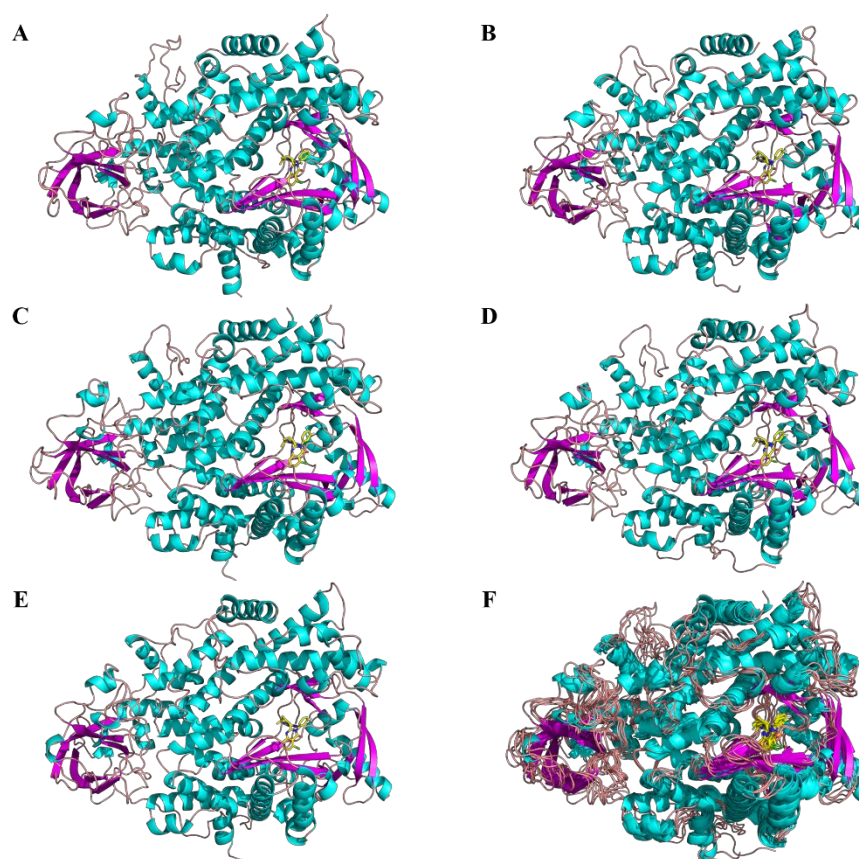

**Figure S5.** Snapshots of the compound **50**/ PI3K $\delta$  complex along the dynamic simulation time at 100<sup>th</sup>, 200<sup>th</sup>, 300<sup>th</sup>, 400<sup>th</sup> and 500<sup>th</sup> ns. For clarity, the water molecules have been removed. The compound 50 is plotted using stick style, while cartoon style for PI3K $\delta$ . (A) for 100<sup>th</sup> ns. (B) for 200<sup>th</sup> ns. (C) for 300<sup>th</sup> ns. (D) for 400<sup>th</sup> ns. (E) for 500<sup>th</sup> ns. (F) the aligned conformations.

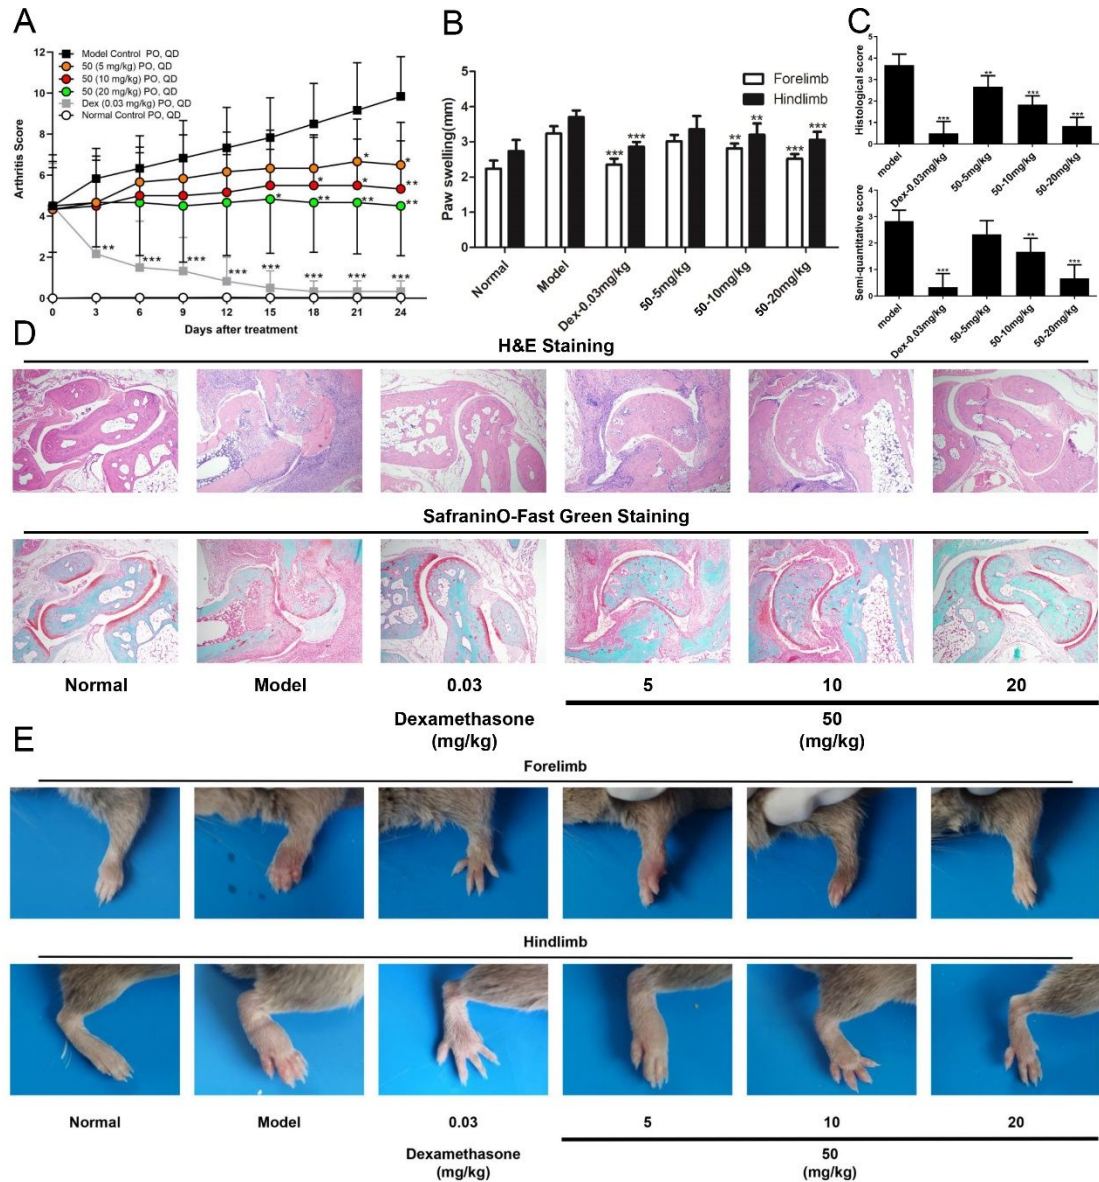

**Figure S6.** Therapeutic efficacy of **50** in mice established collagen-induced arthritis.

(A). Clinical arthritis scores of DBA/1J mice with CIA treated with vehicle, **50** (5, 10, and 20 mg/kg), and dexamethasone (0.03 mg/kg), once daily by oral administration, for 24 days. (B) Paw swelling of forelimb and hindlimb of mice after treatment with vehicle, **50** (5, 10, and 20 mg/kg), and dexamethasone (0.03 mg/kg). Paw swelling of CIA mice was measured with a slide gauge on day 24. (C) Histopathology for ankles includes separate scores for H&E staining and safraninO-fast green staining (semi-quantitative

score). (D) Representative ankle photomicrographs from mice with the approximate mean group score from normal, model control, dexamethasone (0.03 mg/kg), **50** (5, 10, and 20 mg/kg). (E) Forelimbs and hindlimbs of mice after treatment with vehicle, **50** (5, 10, and 20 mg/kg), and dexamethasone (0.03 mg/kg) on day 24. Dex = dexamethasone. The asterisk (\*) denotes significance compared with vehicle control, \*P < 0.05; \*\*P < 0.01, \*\*\*P < 0.001 versus vehicle group. See Support Information for Scoring Criteria for CIA model.

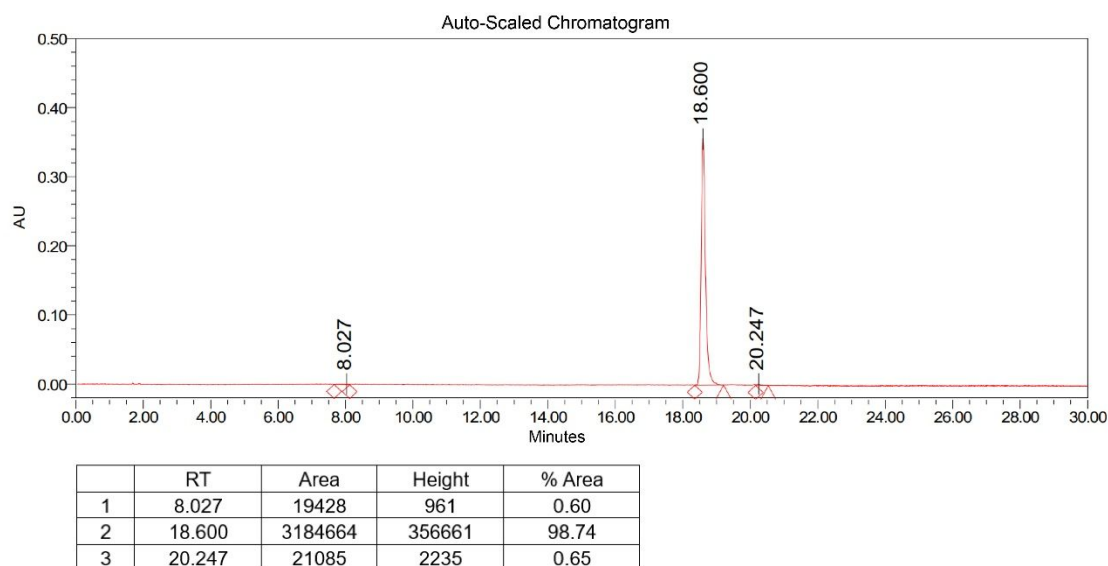

**Figure S7.** HPLC spectra of compound **50**.



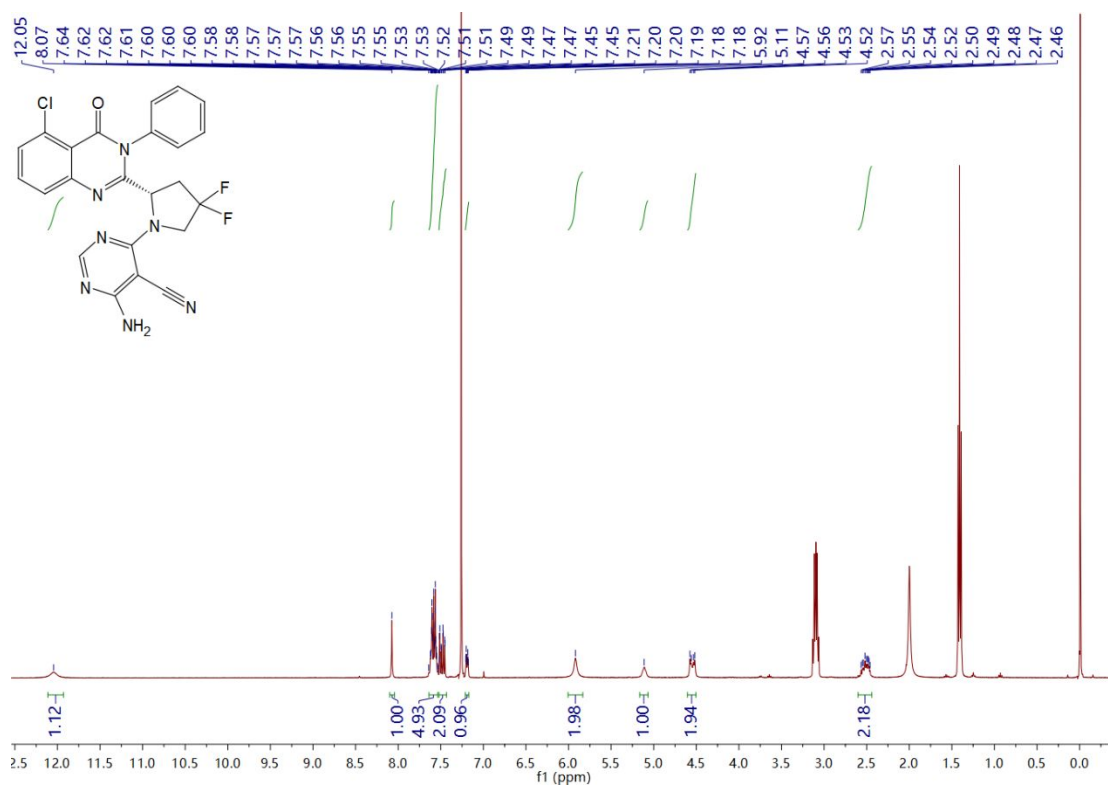

**Figure S8.** <sup>1</sup>H NMR spectra of compound **26**.

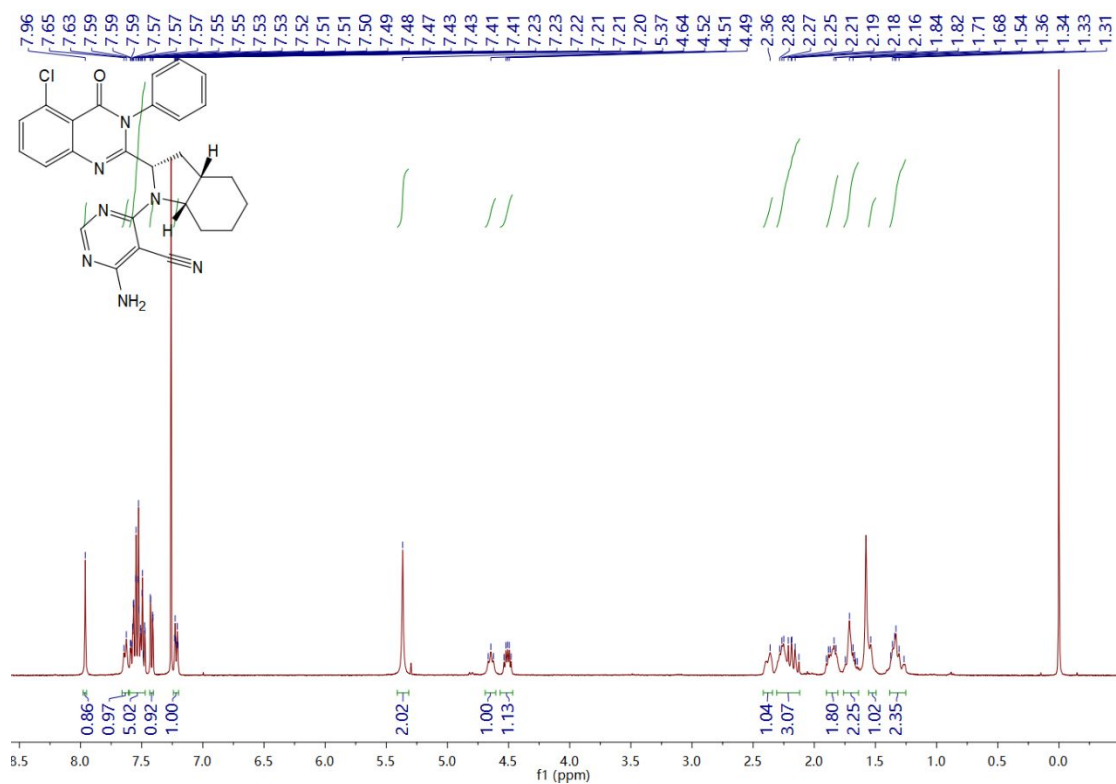

**Figure S9.** <sup>1</sup>H NMR spectra of compound **30**.

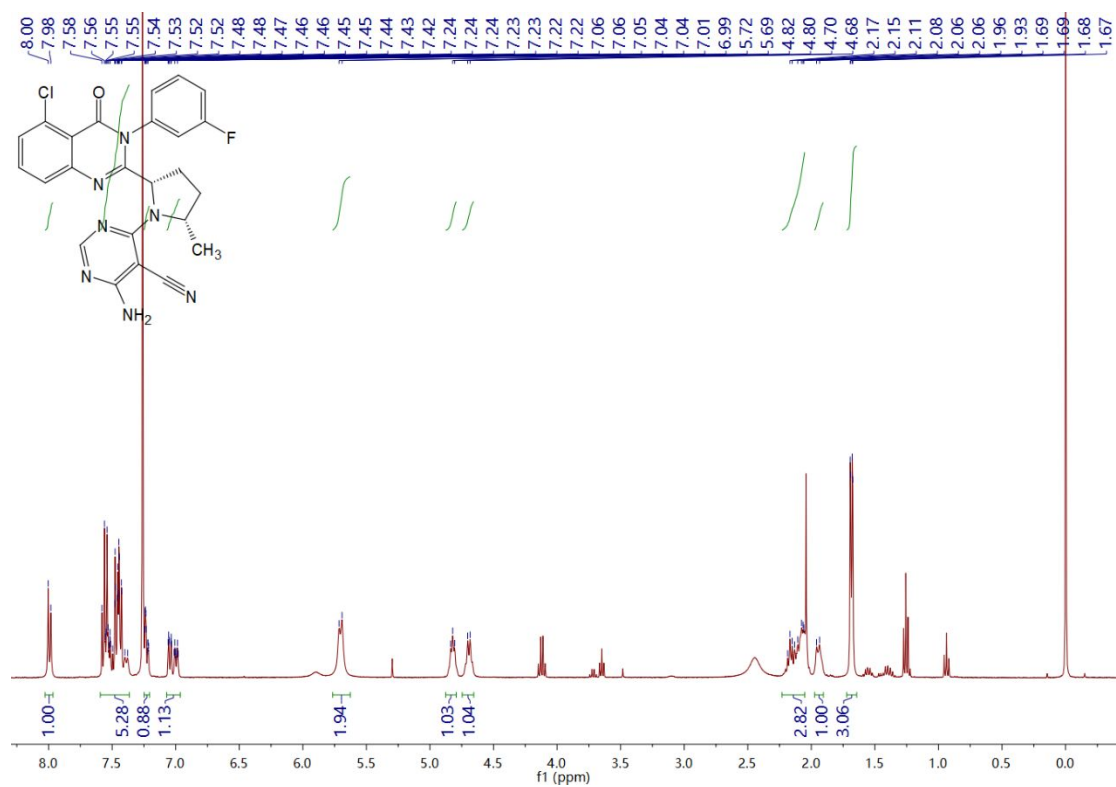

**Figure S10.** <sup>1</sup>H NMR spectra of compound 45.

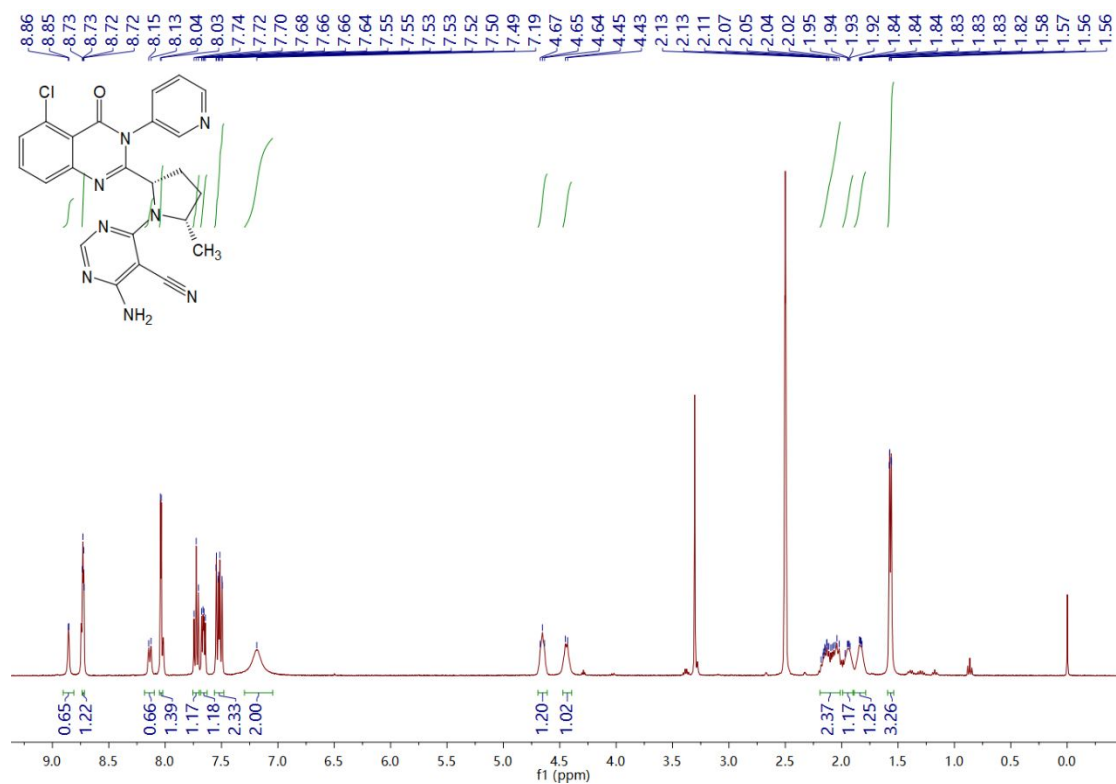

**Figure S11.** <sup>1</sup>H NMR spectra of compound 46.

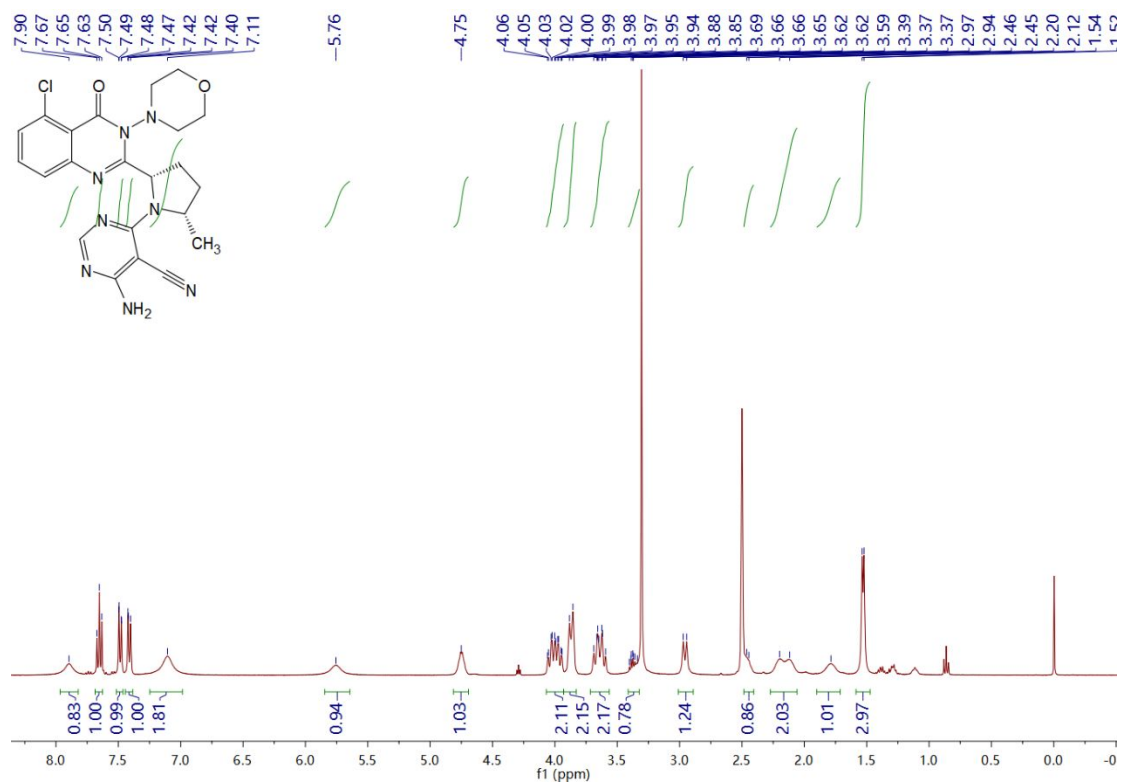

**Figure S12.** <sup>1</sup>H NMR spectra of compound 47.

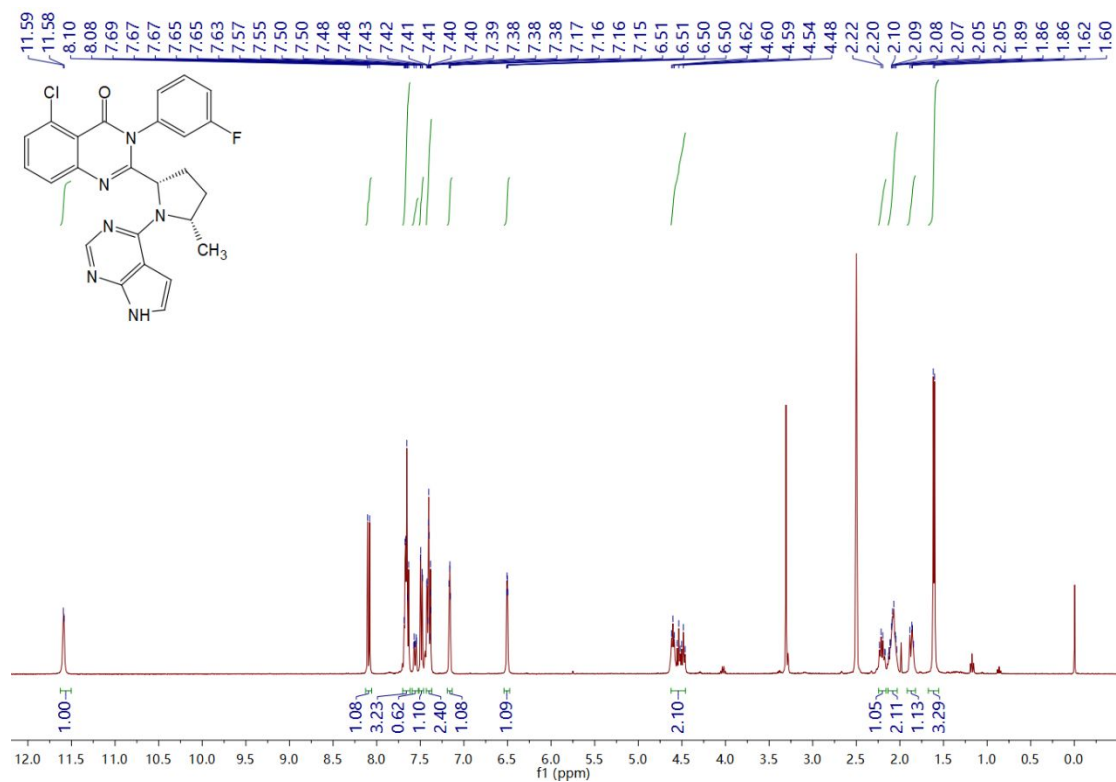

**Figure S13.** <sup>1</sup>H NMR spectra of compound 49.

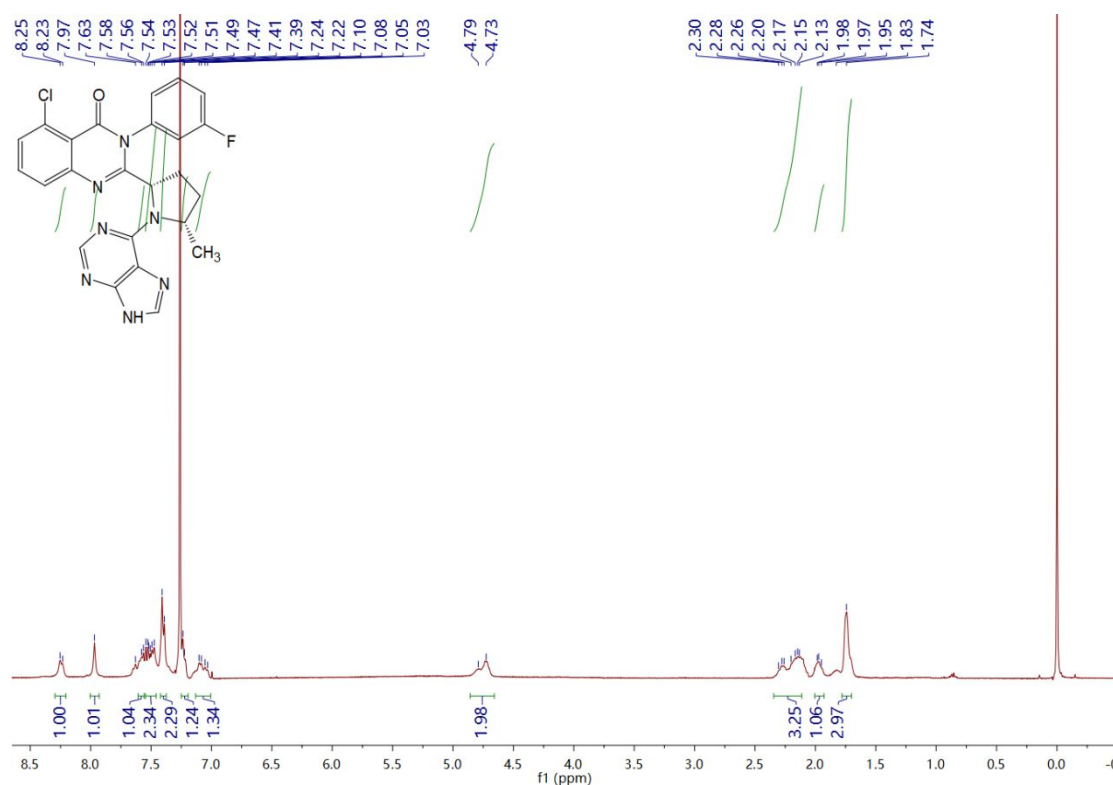

**Figure S14.** <sup>1</sup>H NMR spectra of compound **50**.

## SMARTCyp.

### Methodology of SMARTCyp.

SMARTCyp is a method for prediction of which sites in a molecule that are most liable to metabolism by Cytochrome P450. It has been shown to be applicable to metabolism by the isoforms 1A2, 2A6, 2B6, 2C8, 2C19, 2E1, and 3A4 (CYP3A4), and specific models for the isoform 2C9 (CYP2C9) and isoform 2D6 (CYP2D6) are included from version 2.1. CYP3A4, CYP2D6, and CYP2C9 are the three of the most important enzymes in drug metabolism since they are involved in the metabolism of more than half of the drugs used today.

To construct the SMARTCyp method a large number of Density Functional Theory

(DFT) calculations of fragment activation energies have been performed. The results have been compiled into rules consisting of SMARTS patterns and associated energies. SMARTCyp only uses the 2D structure of a compound, and the energy required for oxidation at each atom is computed by fragment matching towards the SMARTS patterns. If multiple patterns match the same atom the pattern with the lowest energy is used. The accessibility is approximated as the relative topological distance of an atom from the center of the molecule, and the final score is computed as  $\text{Score} = \text{energy} - 8 * \text{accessibility} - 0.04 * \text{SASA}$ .

The SMARTCyp 2D6 model is slightly more complex, using the basic SMARTCyp reactivity, plus the distance from an atom to the end of the molecule (Span2End), and the distance from an atom to a protonated amine nitrogen atom (N+dist). A linear correction is then applied giving a final 2D6-score =  $\text{energy} + 6.7 * (8 - \text{N+dist} + \text{Span2End})$ . Cutoffs are applied so that N+dist is never larger than 8, and Span2End is never larger than 4.

The SMARTCyp 2C model is a remake of the 2D6 model, using the basic SMARTCyp reactivity, plus the distance from an atom to the end of the molecule (Span2End), and the distance from an atom to a carboxylic acid (or a bioisoster thereof) oxygen atom (COO-dist). A linear correction is then applied giving a final 2C-score =  $\text{energy} + 5.9 * (8 - \text{COO-dist} + \text{Span2End}) - 0.04 * \text{SASA}$ . Cutoffs are applied so that COO-dist is never larger than 8, and Span2End is never larger than 4. The detailed protocol descriptions can be provided at the website

([https://smartcyp.sund.ku.dk/interpret\\_smartcyp](https://smartcyp.sund.ku.dk/interpret_smartcyp)).

### Explanation of Output

- The results are shown in form of a structure and a table for each molecule.
- The 3 top ranking atoms are highlighted both in the structure and table.
- The figure can be switched to showing atom numbers by hovering the mouse pointer over the figure. The atom numbers will be hidden if you move the pointer away from the figure.
- The table gives the Rank, Atom (type and number), Score, Energy, Accessibility, 2DSASA, and Similarity.
- The atoms in the tables are ranked by Score, with the lowest score resulting in the lowest rank, and thus the highest probability of being a site of metabolism.
- If the energy is 999, then there is no matching energy rule. Such sites should not be considered as possible sites of metabolism.
- While the top three sites are coloured for easier identification this does not mean there is a cutoff saying that there are always three likely sites, the score is what matters.
- The similarity is a number from 0 (low) to 1 (high). It indicates how similar the atom in the molecule is to an atom in a fragment on which the activation energies have been determined with DFT.

**Molecular Docking Study.** For the PI3K $\delta$  structure-based ligand design, different crystal structures of PI3K $\delta$  in complex with ATP, inhibitors, and apo are publicly available. However, no crystal structures of human PI3K $\delta$  complexed with idelalisib

inhibitors are available, and only mouse PI3K $\delta$  has been published. Therefore, the receptor protein PI3K $\delta$  (PDB ID: 4XE0) was selected as the docking model. The protein structure was processed via PyMOL to remove the solvent molecules and the origin bound ligand. The protein structure was pretreated with the AutoDockTools, including adding hydrogen, equilibrium charge, adjustment of unreasonable atomic overlap, and so on. The molecular structures of compounds were constructed using InDraw software and saved as SDF format files. Then the molecular structures of compounds were added hydrogen at pH=7.0, adjusted pH state, generate 3D coordinates using the OpenBabel software. The molecule structures were minimized by PM3 force field by MOPAC2016. The partial charges for receptor and ligands were assigned using AutoDockTools with Gasteiger method. A grid map of 40  $\times$  40  $\times$  40 point with 0.375 Å grid spacing was generated using AutoGrid module based on the center of Idelalisib within 4EXO. The 100 conformations of each compound were finally generated for a 150 population size with a 2,500,000 maximum number of energy evaluation for each docking experiment using AutoDock. Subsequently, the best conformation of each docking models was remained and drawn the picture using PyMOL. The “re-docking” strategy was used to assess the docking power via the reported crystal structure for PI3K $\delta$  complexed with idelalisib. The root mean square deviation (RMSD) between the crystal structure and the conformer with the lowest energy (-9.32 kcal/mol) from docking is 0.9 Å. To this point, we then applied molecular docking method in the construction of compound/PI3K $\delta$  complex structure.

**Molecular Dynamics Simulation.** The complex structure of idelalisib/PI3K $\delta$  obtained from the protein data bank (PDB ID: 4XE0) and the compound **50**/PI3K $\delta$  complex structure was constructed from the docking study. The AMBER ff19SB force field was used to create topology parameters of PI3K $\delta$ . To correctly describe the idelalisib and compound 50 force field, the general Amber force field (GAFF) generation procedure was used. The geometry structure was optimized at B3LYP/6-31G level of theory using Gaussian 09. To obtain the partial atomic charges, the restrained electrostatic potential (RESP) protocol was employed at the HF/6-31G level of theory. The force field parameters were generated using the Antechamber module. Firstly, the complex systems were dissolved in a TIP3P water with cuboid box and the systems were neutralized using the Cl ions. To reduce the effect of unfavorable interactions produced by solvents and ion, we used three steps to minimize the complex systems for the two ligand/PI3K $\delta$  complex systems. Following, the system was heated to 300 K and kept the pressure to 1 bar. Subsequently, the whole system underwent the 500 ns molecular dynamics for final data collection and analyses. The periodic boundary conditions were applied to avoid edge effects and a cut-off radius of 12 Å was employed for van der Waals interactions. The particle mesh Ewald (PME) algorithm also was used in calculating the long-range electrostatic interactions. The SHAKE algorithm was used to constrain the covalent bond involved with hydrogen atoms. The detail of the molecular dynamics simulation can be found in the other references.<sup>1,2</sup> The result was analyzed by the *CPPTAJ*.



**Binding Free Energy.** To quantitatively assess the binding affinity of inhibitors with the PI3K $\delta$ , it would be useful to calculate the corresponding binding free energies. In this work, molecular mechanics generalized Born surface area (MM/GBSA) were employed to calculate the binding free energies. For each complex system, binding energies were averaged over 1000 frames of the last 200 ns MD trajectory.

### **Biological Assay Methods**

**Enzyme assays (Non-radioactive assays).** The assay was carried out by Eurofins Discovery (Cerep, France) according to the individual kinase assay protocols (non-radioactive assay). The class I PI3K isoforms were incubated in assay buffer containing 10  $\mu$ M phosphatidylinositol 4,5-bisphosphate and Mg/ATP (ATP concentration was determined according to  $K_m$  ATP). The reaction was initiated by the addition of the ATP solution for PI3K p110 $\alpha$ /p85 $\alpha$  (h) and the Mg/ATP mix for I3K (p110 $\beta$ /p85 $\alpha$ ) (h), PI3K (p110 $\delta$ /p85 $\alpha$ ) (h), and PI3K (p120 $\gamma$ ) (h). After incubation for 30 minutes at room temperature, the reaction was stopped by the addition of stop solution containing EDTA and biotinylated phosphatidylinositol- 3,4,5-trisphosphate. Finally, detection buffer was added, which contained europium-labelled anti-GST monoclonal antibody, GST-tagged GRP1 PH domain and streptavidin allophycocyanin. The plate was then read in time-resolved fluorescence mode and the homogeneous time-resolved fluorescence (HTRF) signal was determined according to the formula  $HTRF = 10000 \times (Em665nm/Em620nm)$ . The kinases activity of 10  $\mu$ M **50** on 163 kinases were measured by radiometric assays or non-radioactive assays. For radiometric assay, each

kinase was incubated with 10  $\mu$ M **50** in indicated reaction solutions contained [ $\gamma$ - $^{33}$ P-ATP] (ATP concentration was determined according to  $K_m$  ATP) and other reagents such as MOPS, EDTA, EAIYAAPFAKKK, Magnesium acetate and so on (different pH, concentrations and activities according to the specific needs of different kinases). The reaction is initiated by the addition of the Mg(n)/ATP mix. After incubation for a while (specific time as required) at room temperature, the reaction is stopped by the addition of phosphoric acid to a concentration of 0.5%. 10  $\mu$ L of the stopped reaction is spotted onto a P30 filtermat and washed four times for 4 minutes in 0.425% phosphoric acid and once in methanol prior to drying and scintillation counting. For non-radioactive assay, each kinase was incubated with 10  $\mu$ M **50** in assay buffer containing Mg/ATP (ATP concentration was determined according to  $K_m$  ATP) and other reagents such as phosphatidylinositol 4,5-bisphosphate, phosphatidylinositol, phosphatidylserine, GST-cMyc-p53, and so on (different compositions and concentrations according to the specific needs of different kinases). The reaction is initiated by the addition of the ATP solution or the Mg/ATP mix. After a period of incubation (different kinases require different time) at room temperature, the reaction is stopped by the addition of stop solution containing EDTA or other reagents such as biotinylated phosphatidylinositol- 3,4,5-trisphosphate (different compositions and concentrations according to the specific needs of different kinases). Finally, detection buffer is added, which contains europium-labelled anti-GST monoclonal antibody or other reagents such as GST-tagged GRP1 PH domain and streptavidin allophycocyanin

(different compositions and concentrations according to the specific needs of different kinases). The plate is then read in timeresolved fluorescence mode and the homogeneous time-resolved fluorescence (HTRF) signal is determined according to the formula  $HTRF = 10000 \times (Em665nm/Em620nm)$ . The in vitro kinase enzymatic inhibition assays were carried out by the Kinase Profiling Services provided by Eurofins (France). The detailed protocol descriptions can be provided at the website: <https://www.eurofinsdiscoveryservices.com>

### **Class I PI3K Isoform-Selective Cellular Assays**

Class I PI3K isoform-selective cellular assays were performed under analogous conditions as reported (Winkler, D. G. et al. *Chem. Biol.* **2013**, *20*, 1364-1374).<sup>3</sup> SKOV-3, 786-O, RAW264.7 and RAJI cell lines were purchased from ATCC (Manassas, VA). Cell culture was performed under aseptic conditions.

#### **PI3K $\alpha$ Assay Design**

SKOV-3 cells were seeded into 96-well cell culture-grade plates at a density of 200,000 cells/200  $\mu$ L/well of RPMI-1640 with 10% FBS. Cells were incubated overnight at 5% CO<sub>2</sub> and 37°C. Compound **50** was added to the cells, resulting in a final DMSO concentration of 0.5%, and incubated for 30 minutes at 5% CO<sub>2</sub> and 37°C. Media was then aspirated and 50  $\mu$ L/well of ice-cold lysis buffer was added. Plates were incubated on ice for 5 minutes and then centrifuged at 3000 rpm at 4 °C for 5 minutes.

#### **PI3K $\beta$ Assay Design**

786-O cells were seeded into 96-well cell culture-grade plates at a density of 200,000

cells/200  $\mu$ L/well of DMEM with 10% FBS. Cells were incubated overnight at 5% CO<sub>2</sub> and 37 °C. Compound **50** was added to the cells, resulting in a final DMSO concentration of 0.5%, and incubated for 30 minutes at 5% CO<sub>2</sub> and 37°C. Media was then aspirated and 50  $\mu$ L/well of ice-cold lysis buffer was added. Plates were incubated on ice for 5 minutes and then centrifuged at 3000 rpm at 4°C for 5 minutes.

### **PI3K $\gamma$ Assay Design**

RAW264.7 cells were seeded into 96-well cell culture-grade plates at a density of 200,000 cells/200 $\mu$ L/well of RPMI-1640 with no FBS added. Cells were incubated overnight at 5% CO<sub>2</sub> and 37°C. Following 18 hours of serum-starvation, compound **50** was added to the cells, resulting in a final DMSO concentration of 0.5%, and incubated for 30 minutes at 5% CO<sub>2</sub> and 37°C. Cells were then stimulated with 25 nM C5a (RnD Systems) for 3 minutes. Media was aspirated and 50  $\mu$ L/well of ice-cold lysis buffer was added. Plates were incubated on ice for 5 minutes and then centrifuged at 3000 rpm at 4°C for 5 minutes.

### **PI3K $\delta$ Assay Design**

RAJI cells were seeded into 96-well cell culture-grade plates at a density of 200,000 cells/200  $\mu$ L/well of RPMI-1640 with no FBS added. Cells were incubated overnight at 5% CO<sub>2</sub> and 37°C. Following 18 to 24 hours of serum-starvation, Compound **50** was added to the cells, resulting in a final DMSO concentration of 0.5%, and incubated for 30 minutes at 5% CO<sub>2</sub> and 37°C. Cells were then stimulated with 10  $\mu$ g/mL anti-human IgM (Jackson ImmunoResearch) for 30 minutes in the presence of **50**. Media was

aspirated and 50  $\mu$ L/well of ice-cold lysis buffer was added. Plates were incubated on ice for 5 minutes and then centrifuged at 3000 rpm at 4°C for 5 minutes.

### **ELISA Data Analysis**

Lysates from the 4 isoform-selective assays were added to the pAKT ELISA plate without dilution. The ELISA was completed following the manufacturer's protocol. Absorbance at 450 nm was read on a SpectraMax plate reader. For SKOV-3 and 786-O cell assays, there is no stimulation thus the negative control is cells treated only with DMSO. Inhibition isotherms of AKT phosphorylation were generated by plotting the % inhibition against the inhibitor concentration, and the IC<sub>50</sub> values were determined by fitting to a 4 parameter logistics equation utilizing non-linear least squared regression analysis via the program KaleidaGraph.

### **Basophil Activation Assay in HWB.**

Basophil activation was measured in human whole blood using the Flow2 CAST kit (Buhlmann Laboratories, Switzerland) following the protocol provided by the manufacturer with minor modifications. Human whole blood was collected into K2-EDTA venipuncture tubes. Whole blood samples were incubated with either DMSO (0.3% final) or a serial dilution of **50** in DMSO for 60 min at 37 °C. To activate basophils using the anti-Fc $\epsilon$ RI mAb; 50  $\mu$ L of whole blood was mixed with 130  $\mu$ L of stimulation buffer and 10  $\mu$ L of anti-Fc $\epsilon$ RI. Stimulation buffer alone was used as a negative control. The cells were stained with anti-CD63-FITC and anti-CCR3 (CD193)-PE antibodies for 25 min at 37°C. 2 mL lysis solution was added to lyse

erythrocytes to fix blood cells. After a 10 min incubation at room temperature, cells were pelleted and resuspended in wash buffer and analyzed by flow cytometry. Degranulation was detected via CD63 surface expression on CCR3 positive cells. The percent CD63 positive cells within the gated basophil population was determined in different treatment groups and normalized to the vehicle control (0.3% DMSO). Data were plotted using the Prism software, and  $IC_{50}$  values were determined. Data were analyzed via one-way analysis of variance (ANOVA), followed by Dunnett's test.

#### **B Cell Activation Assay in HWB.**

Whole blood was pretreated with **50** for 60 min. The blood was stimulated with anti-IgM (Jackson ImmunoResearch) at 37°C overnight. After red blood cell (RBC) depletion, cells were harvested and stained with APC-labeled anti-CD19 antibody (BD Biosciences) and fluorescein isothiocyanate (FITC)-labeled anti-CD69 antibody (BD Biosciences) for flow cytometry analysis. Activated B-cells were gated based on B220 and CD86 expressions. The ratio of CD19<sup>+</sup>CD69<sup>+</sup> positive cells in compound-treated blood as compared to the untreated control was used to determine the percent inhibition by compound treatment. Data were plotted using the Prism software, and  $IC_{50}$  values were determined. Data were analyzed via one-way ANOVA, followed by Dunnett's test.

#### **Primary Human T-cell Proliferation Assays**

Human peripheral blood CD3<sup>+</sup> T-cells were purchased from Allcells (Emeryville, CA). Pre-diluted compound in DMSO or DMSO alone (control) were incubated with cells

(100,000 cells in RPMI-1640 media supplemented with 10% fetal calf serum, penicillin, streptomycin and 50  $\mu$ M  $\beta$ -mercaptoethanol) for 1 hour at 37°C (final DMSO 0.1%). For stimulation of T-cell proliferation, a cocktail consisting of ConA (Sigma Aldrich) was added yielding a final concentration of 5 $\mu$ g/mL. Cells were incubated at 37°C with 5% CO<sub>2</sub> for 72 hours to get optimal signal to noise for each assay. Cell number was measured using the CellTiter-Glo Luminescent Cell Viability Assay reagent (Promega).

**Microsome Stability Assay.** Human liver microsomes and reduced nicotinamide adenine dinucleotide phosphate (NADPH, solution A 2.5mL and solution B 0.5mL) were both supplied by Wuhan PrimeTox Bio-pharma Technology Co., Ltd. Metabolic stability in vitro was determined using pooled hepatic microsomal fractions at a final test compound concentration of 1  $\mu$ M. In general, incubation mixtures consisted of 0.1 M potassium phosphate buffer at pH 7.4, NADPH regenerating system (containing 1 mM NADP, 5 mM D-Glucose-6-phosphate, 1 U/mL glucose 6-phosphatedehydrogenase, and 3.3 mM MgCl<sub>2</sub>) with a final volume of 100  $\mu$ L. The stock solution of the test compound and SAHA (internal standard, IS) were prepared with methanol first and then diluted to designated concentration. The solution of the test compound (0.5 $\mu$ L, 200 $\mu$ M/L) was added into the incubation mixtures in an ice bath, then the incubation system was put into 37°C water bath for pre-incubation. The solution of human liver microsomes (2.5  $\mu$ L, 20 mg/mL) was added into the incubation mixtures after 5 minutes. The incubation was typically terminated by adding 200  $\mu$ L cold acetonitrile containing IS (10ng/mL) at various time points (0, 5, 15, 30, 45, and

60min). The terminated incubation mixtures were centrifuged at 13000 rpm for 15 min, and then supernatant was injected for analysis.

**Pharmacokinetic Study.** Sprague-Dawley rats were supplied by Chengdu Dossy Experimental Animals Co., Ltd. A 1 mg/mL dosing solution of **50** was prepared by dissolving in physiological saline containing 1% DMSO, 1% Tween 80 for po or iv administration. Six SD rats, weighing 200–250 g each, were obtained from Chengdu Dossy Experimental Animals Co., Ltd. The tested compound was separately administered intravenously (5 mg/kg dose) or orally (5 mg/kg) to a group of six rats per time. At time points 0 (prior to dosing), 5 min, 15 min, 30 min, 45 min, 1 h, 2 h, 4 h, 6 h, 8 h, 10 h, 12 h, and 24 h after dosing, a blood sample was collected from each animal via cardiac puncture and stored in refrigerator (–20°C). Plasma was separated from the blood by centrifugation (4000 g for 15 min at 4°C) and stored in a freezer at –80°C. All samples were analyzed for the tested compound by LC–MS/MS (Waters Acquity UPLC system; Waters Quattro Premier XE). Data were acquired via monitoring of multiple reactions. Plasma concentration data were analyzed by a standard noncompartmental method.

#### **Collagen-Induced Arthritis (CIA) Model.**

DBA1/J male mice (6-8 weeks old) were obtained from Beijing HFK Bioscience Co., Ltd, and maintained in specific pathogen free air at a temperature of  $22 \pm 2^{\circ}\text{C}$  on a 12-h light/dark cycle with food and water ad libitum and relative humidity of 50%. Standard laboratory chow and water ad libitum were ensured. The animal protocol was



approved by the Animal Care and Use Committee of Sichuan University in China (IACUC number: 20100318). One day before the start of the experiment, CII solution (2 mg/ml) was prepared with 0.05 M acetic acid and stored at 4°C. Just before the immunization, equal volumes of IFA and CII were mixed by a homogenizer in a precooled glass bottle in an ice water bath. Arthritis was induced by subcutaneous injection with a 1:1 emulsion of bovine type II collagen (Chondrex) and Freund's complete adjuvant (Sigma-Aldrich) at the base of the tail. On day 21, Mice were suffered a booster injection with a 1:1 emulsion of bovine type II collagen in Freund's incomplete adjuvant (Sigma-Aldrich) at the tail, but at a different location from the site of first injection. Thereafter, all mice were monitored daily for signs of arthritis: redness and swelling of a fore or hind paw. On the day treatment was initiated, mice were randomly divided into several groups with each containing the same number of animals, and then treated with vehicle (the group of Model), 0.03 mg/kg Dexamethasone, 20 mg/kg CAL-101, 5, 10, and 20 mg/kg compound **50**, respectively (pharmaceutical solution formulations: 2% dimethyl sulfoxide, 30% polyethylene glycol 400, 0.5% polysorbate 80, and 5% sodium carboxymethyl cellulose solution). The treatment continued for 24 or 27 days, during which the arthritis index was measured every three days. For the development of CIA and inflammation of the four paws was graded from 0 to 4: grade 0, paws with no swelling and focal redness; grade 1, paws with swelling of finger joints; grade 2, paws with mild swelling of ankle or wrist joints; grade 3, paws with severe inflammation of the entire paw; and grade 4,

paws with deformities or ankyloses. Each paw was graded and the four scores were totaled so that the possible maximum score per mouse was 16.<sup>4,5</sup>

### **Histological Examination.**

DBA1/J mice were sacrificed on day 24 after treatment and ankle joints were removed and fixed with 4% paraformaldehyde for more than 48 h. The joints were decalcified in EDTA buffer for 21 days and then embedded in paraffin blocks. Joint sections were stained with H&E or safranin O-fast green. The histological changes were examined under microscope. All sections were evaluated histologically by two independent observers. For H&E, the gradation of arthritis was scored from 0 to 4 according to the intensity of lining layer hyperplasia, mononuclear cell infiltration, and pannus formation, as described previously<sup>6</sup>. 0, normal ankle joint; 1, normal synovium with occasional mononuclear cells; 2, definite arthritis, a few layers of flat to rounded synovial lining cells and scattered mononuclear cells; 3, clear hyperplasia of the synovium with three or more layers of loosely arranged lining cells and dense infiltration with mononuclear cells; 4, severe synovitis with pannus and erosions of articular cartilage and subchondral bone. Safranin O staining was scored with a semiquantitative scoring system (0–3), where 0 represents no loss of proteoglycans and 3 indicates complete loss of staining for proteoglycans.<sup>7</sup>

### **Reference:**

- (1) Wang, P.; Mao, L.; Shi, M.; Fu, Y.; Jiang, X.; Feng, W.; He, Y.; Xu, D.; Yuan, L. The Cytochrome c–Cyclo[6]Aramide Complex as a Supramolecular Catalyst

- in Methanol. *New J. Chem.* **2018**, 42 (5), 3857–3866.
- (2) Xiaoqin; Wang; Zhi-Min; Li; Qingyue; Mingsong; Shi; Lingling; Bao; Dingguo. Purification and Biochemical Characterization of FrsA Protein from *Vibrio Vulnificus* as an Esterase. *PLoS One* **2019**, 14 (4): e0215084.
- (3) Winkler, D. G.; Faia, K. L.; Dinitto, J. P.; Ali, J. A.; White, K. F.; Brophy, E. E.; Pink, M. M.; Proctor, J. L.; Lussier, J.; Martin, C. M.; Hoyt, J. G.; Tillotson, B.; Murphy, E. L.; Lim, A. R.; Thomas, B. D.; MacDougall, J. R.; Ren, P.; Liu, Y.; Li, L. S.; Jessen, K. A.; Fritz, C. C.; Dunbar, J. L.; Porter, J. R.; Rommel, C.; Palombella, V. J.; Changelian, P. S.; Kutok, J. L. PI3K- $\delta$  and PI3K- $\gamma$  Inhibition by IPI-145 Abrogates Immune Responses and Suppresses Activity in Autoimmune and Inflammatory Disease Models. *Chem. Biol.* **2013**, 20 (11), 1364–1374.
- (4) Hegen, M.; Keith, J. C.; Collins, M.; Nickerson-Nutter, C. L. Utility of Animal Models for Identification of Potential Therapeutics for Rheumatoid Arthritis. *Ann. Rheum. Dis.* **2008**, 67 (11), 1505–1515.
- (5) Alonzi, T.; Fattori, E.; Lazzaro, D.; Costa, P.; Probert, L.; Kollias, G.; De Benedetti, F.; Poli, V.; Ciliberto, G. Interleukin 6 Is Required for the Development of Collagen-Induced Arthritis. *J. Exp. Med.* **1998**, 187 (4), 461–468.
- (6) Brackertz, D.; Mitchell, G. F.; Mackay, I. R. Antigen-Induced Arthritis in Mice. I. Induction of Arthritis in Various Strains of Mice. *Arthritis Rheum.*

1977, 20 (3), 841–850.

- (7) Dudler, J.; Renggli-Zulliger, N.; Busso, N.; Lotz, M.; So, A. Effect of Interleukin 17 on Proteoglycan Degradation in Murine Knee Joints. *Ann. Rheum. Dis.* **2000**, 59 (7), 529–532.
